# Supplementary material
Source: publisher figshare collection journal article supplement (https://tandf.figshare.com/ndownloader/files/13152434)
Supplement: Supplementary file 1 [file 13152434]

**Supplementary Material**


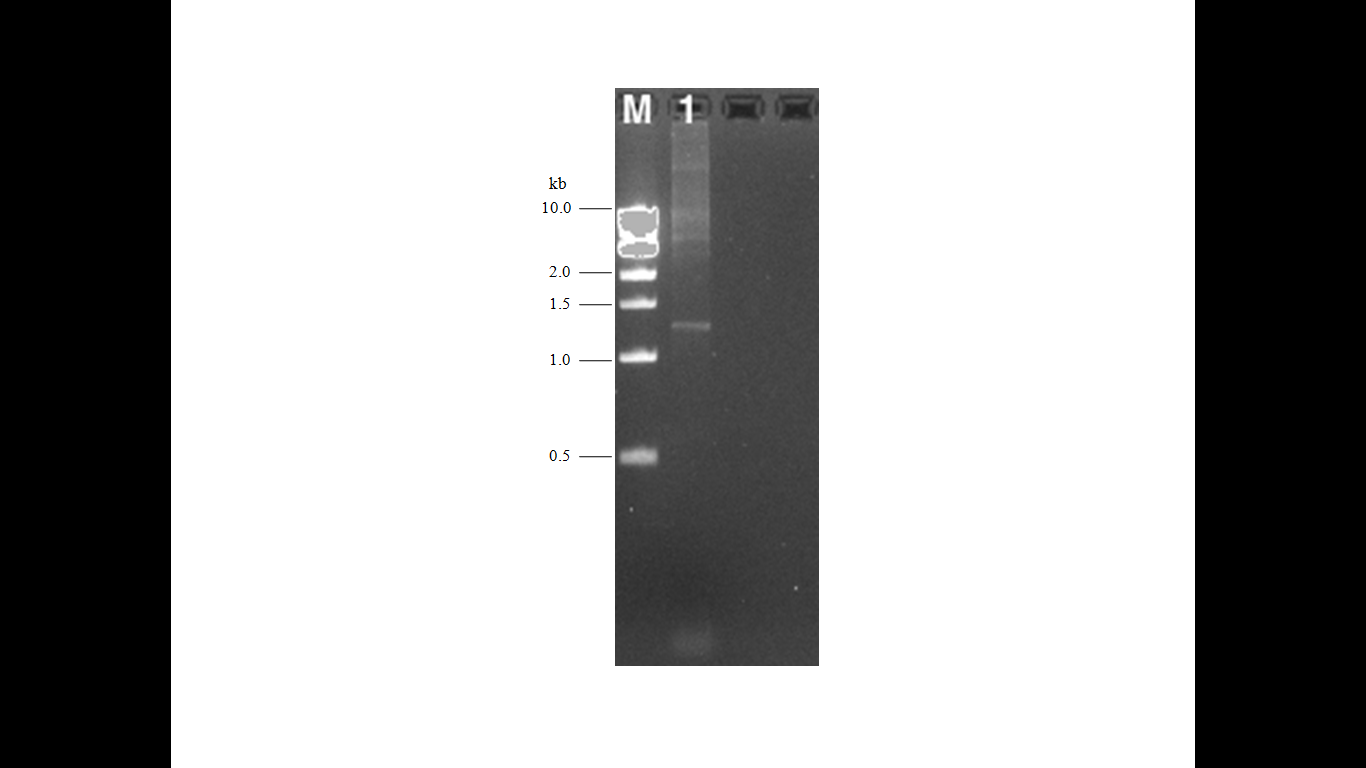


**Fig. S1.** 1% agarose gel photograph of the control PCR of *hasA* gene of the transformed colony. M: 1 kb DNA ladder, 1: Amplicon of *hasA* gene which exists on newly constructed plasmid pNZ8150-hasA. The amplicon seems in its right place in which length should be 1254 bp.
